# Supplementary material for: 3D-Printed glycerol microfluidic fuel cell
Source: Royal Society of Chemistry journal article supplement (doi:10.1039/d0lc00351d), 2020-01-01
Supplement: d0lc00351d1.pdf [file d0lc00351d1.pdf]

## 3D-printed glycerol microfluidic fuel cell

Katia-Emiko Guima,<sup>a</sup> Pedro-Henrique L. Coelho,<sup>a</sup> Magno A. G. Trindade,<sup>bc</sup> and Cauê Alves Martins<sup>a</sup>

<sup>a</sup>*Physics Institute, Federal University of Mato Grosso do Sul – Av. Costa e Silva, 79070900, Campo Grande, MS, Brazil.*

<sup>b</sup>*Faculdade de Ciências Exatas e Tecnologia, Universidade Federal da Grande Dourados, Rodovia Dourados-Itahum, km 12. Dourados-MS, 79804-970, Brazil.*

<sup>c</sup>*Unesp, National Institute for Alternative Technologies of Detection, Toxicological Evaluation and Removal of Micropollutants and Radioactives (INCT-DATREM), Institute of Chemistry, P.O. Box 355, CEP 14800900 Araraquara (SP), Brazil.*

\*cauemartins@ufms.br

---

\*Corresponding Author. Phone: +55 67 9 9262-4202

e-mail: cauemartins@ufms.br

**Section I:** Printing parameters and microfluidic fuel cell pg 2

**Section II:** Performance of the 3D-printed direct glycerol microfluidic fuel cells pg 2

## Section I: Printing parameters and microfluidic fuel cell

**Table S1.** Printing parameters of the microfluidic fuel cell

| <i>Piece</i>   | <i>BT/min</i> | <i>FL/cm</i> | <i>PW/g</i> | <i>MC/US\$</i> | <i>Resolution (Slice thickness)/mm</i> |
|----------------|---------------|--------------|-------------|----------------|----------------------------------------|
| $\mu$ FC (PLA) | 16            | ~85.00       | 2.54        | 0.38           | 0.1                                    |
| Bottom part    | 6             | ~52.00       | 1.34        | 1.47           | 0.1                                    |

BT = Building time; FL=Filament length; PW=Plastic weight; MC=Material cost.

## Section II: Performance of the 3D-printed direct glycerol microfluidic fuel cells

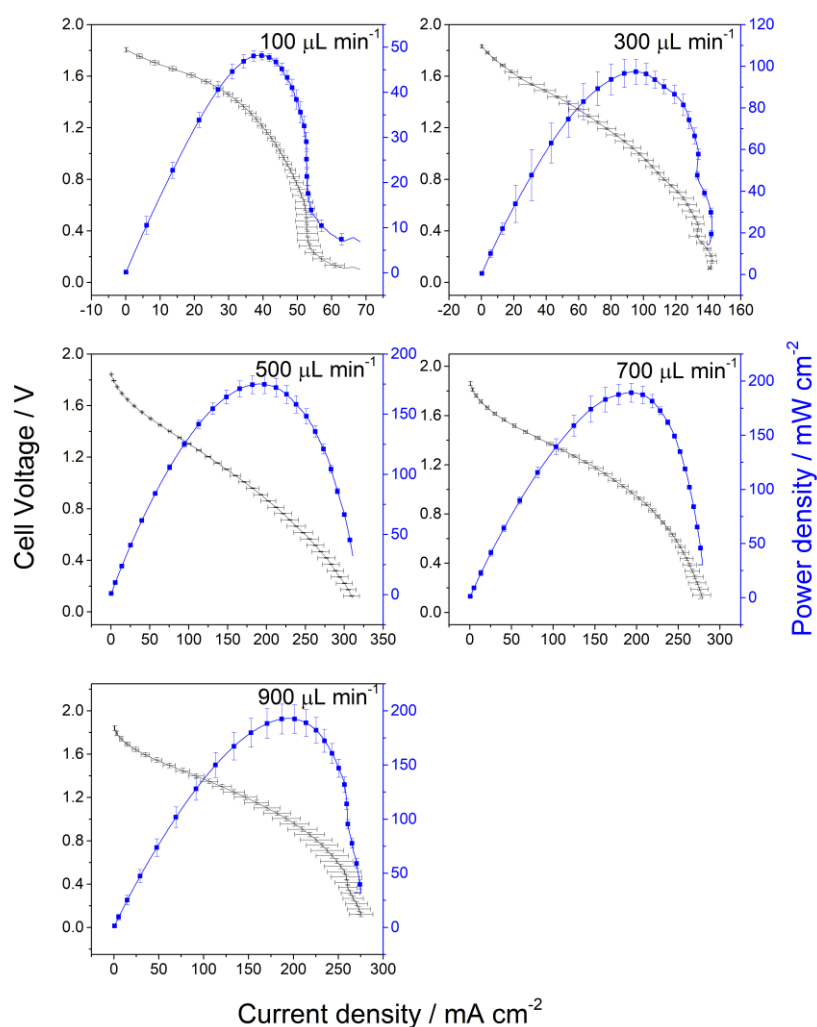

**Figure S1.** Polarization and power density curves for the 3D-printed direct glycerol mixed-media microfluidic fuel cell with Pt/C/CP as anode and cathode in the flow-through configuration. Microfluidic fuel cells were fed by  $\text{N}_2$ -saturated 1 M of glycerol in 1 M KOH and 1 M  $\text{H}_2\text{SO}_4$  6%  $\text{HClO}_4$ . Polarization

curves were measured from open-circuit voltage to 0.1 V at 0.01 V s<sup>-1</sup>. The different flow rates are annotated in the figure.

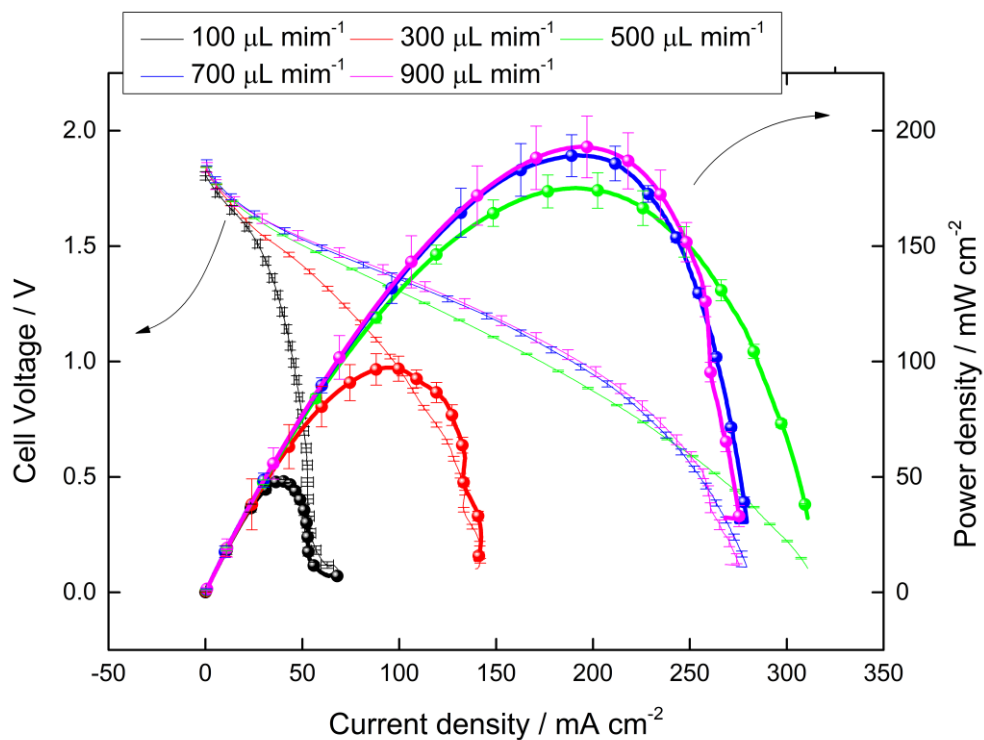

**Figure S2.** Polarization and power density curves for the mixed-media direct glycerol 3D-printed microfluidic fuel cell with electrodes in a flow-through configuration. Polarization curves were measured from open-circuit voltage to 0.1 V at 0.01 V s<sup>-1</sup> for N<sub>2</sub>-saturated 1 M glycerol in 1 M KOH and 1 M H<sub>2</sub>SO<sub>4</sub> in 6% NaClO. All measurements performed in triplicate at flow rates indicated in the Figure.
